# Supplementary material for: Novel physico-chemical diagnostic tools for high throughput identification of bovine mastitis associated gram-positive, catalase-negative cocci
Source: PubMed Central journal article supplement (PMC4105049; doi:10.1186/1746-6148-10-156), 2014-07-11
Supplement: 1746-6148-10-156-S1.pdf [file 1746-6148-10-156-S1.pdf]

**Additional file 1 – Reference strains used in this study**

| Strain                                                 | Species                                        | DSMZ/ATCC   |
|--------------------------------------------------------|------------------------------------------------|-------------|
| <b>Mastitis associated reference strains (n = 16)</b>  |                                                |             |
| 1478                                                   | <i>Aerococcus viridans</i>                     | 20340 T     |
| 1463                                                   | <i>Enterococcus faecalis</i>                   | ATCC 51299  |
| 1476                                                   | <i>Enterococcus faecalis</i>                   | 20478 T     |
| 1462                                                   | <i>Enterococcus faecium</i>                    | ATCC 700221 |
| 1464                                                   | <i>Enterococcus faecium</i>                    | 20477 T     |
| 1081                                                   | <i>Lactococcus garvieae</i>                    | 20064       |
| 1084                                                   | <i>Lactococcus garvieae</i>                    | 20684 T     |
| 1137                                                   | <i>Lactococcus lactis</i>                      | 20481 T     |
| 1426                                                   | <i>Streptococcus agalactiae</i>                | 2134 T      |
| 1138                                                   | <i>Streptococcus bovis</i>                     | 20480 T     |
| 1136                                                   | <i>Streptococcus canis</i>                     | 20715 T     |
| 1135                                                   | <i>Streptococcus dysgalactiae</i>              | 20662 T     |
| 1127                                                   | <i>Streptococcus pyogenes</i>                  | 2071        |
| 1429                                                   | <i>Streptococcus pyogenes</i>                  | 20565 T     |
| 1477                                                   | <i>Streptococcus parauberis</i>                | 6631 T      |
| 1214                                                   | <i>Streptococcus uberis</i>                    | 20569 T     |
| <b>Reference strains used for the outgroup (n = 6)</b> |                                                |             |
| 1428                                                   | <i>Streptococcus equi subsp. equi</i>          | 20561 T     |
| 1431                                                   | <i>Streptococcus equi subsp. zooepidemicus</i> | 20727 T     |
| 1090                                                   | <i>Streptococcus mutans</i>                    | 20523 T     |
| 1427                                                   | <i>Streptococcus pneumoniae</i>                | 20566 T     |
| 1109                                                   | <i>Streptococcus porcinus</i>                  | 20725 T     |
| 1430                                                   | <i>Streptococcus suis</i>                      | 9682 T      |
